# Supplementary material for: The Food Environments of Fruit and Vegetable Consumption in East and Southeast Asia: A Systematic Review
Source: PubMed Central journal article supplement (PMC7824134; doi:10.3390/nu13010148), 2021-01-04
Supplement: nutrients-13-00148-s001.pdf [file nutrients-13-00148-s001.pdf]

**SUPPLEMENTARY DATA.**

**Table S1. Journals, Citations No., H-Index, and Quality Evaluation Scores.**

| ID | Journals | Citations No. | H-Index | QE1 | QE2 | QE3 | QE4 | QE5 | Scores |
|----|----------|---------------|---------|-----|-----|-----|-----|-----|--------|
| 1  | IH       | 1             | 27      | 2   | 2   | 2   | 1   | 1   | 8      |
| 2  | AJARE    | 1             | 46      | 2   | 2   | 2   | 1   | 1   | 8      |
| 3  | BFJ      | 49            | 74      | 2   | 1   | 2   | 2   | 1   | 8      |
| 4  | FC       | 27            | 114     | 2   | 2   | 2   | 2   | 1   | 9      |
| 5  | CJAE     | 36            | 35      | 2   | 2   | 2   | 1.5 | 1   | 8.5    |
| 6  | AMJ      | 7             | 32      | 2   | 1   | 2   | 1   | 1   | 7      |
| 7  | JFAKU    | 33            | 16      | 2   | 1   | 2   | 1   | 1   | 7      |
| 8  | EE       | 5             | 53      | 2   | 1   | 2   | 1.5 | 1   | 7.5    |
| 9  | FP       | 7             | 95      | 2   | 1   | 2   | 2   | 1   | 8      |
| 10 | BFJ      | 36            | 74      | 2   | 2   | 2   | 2   | 1   | 9      |
| 11 | NRP      | 9             | 29      | 2   | 2   | 2   | 1   | 1   | 8      |
| 12 | BFJ      | 2             | 74      | 2   | 2   | 2   | 1.5 | 1   | 8.5    |
| 13 | IJISSS   | 0             | 11      | 2   | 2   | 2   | 1   | 1   | 8      |
| 14 | BJN      | 31            | 178     | 2   | 1   | 2   | 2   | 0   | 7      |
| 15 | FS       | 1             | 41      | 2   | 2   | 2   | 1   | 1   | 8      |
| 16 | PO       | 6             | 300     | 2   | 2   | 2   | 2   | 1   | 9      |
| 17 | FQP      | 38            | 110     | 2   | 2   | 2   | 2   | 1   | 9      |
| 18 | STE      | 10            | 224     | 2   | 1   | 2   | 2   | 1   | 8      |
| 19 | IJBNPA   | 2             | 104     | 2   | 1   | 2   | 2   | 1   | 8      |
| 20 | EHPM     | 28            | 34      | 2   | 2   | 2   | 1.5 | 0   | 7.5    |
| 21 | JCM      | 93            | 91      | 2   | 2   | 2   | 2   | 1   | 9      |
| 22 | EB       | 0             | 27      | 2   | 1   | 2   | 1   | 1   | 7      |
| 23 | JFR      | 11            | 26      | 2   | 1   | 2   | 1   | 1   | 7      |
| 24 | IJER     | 3             | 19      | 2   | 1   | 2   | 1   | 1   | 7      |
| 25 | JCP      | 62            | 173     | 2   | 2   | 2   | 2   | 1   | 9      |
| 26 | BFJ      | 13            | 74      | 2   | 1   | 2   | 1.5 | 1   | 7.5    |
| 27 | CAER     | 2             | 19      | 2   | 1   | 2   | 1   | 1   | 7      |
| 28 | JRS      | 41            | 96      | 2   | 1   | 2   | 2   | 1   | 8      |

**Note.** AB-Agribusiness, AJARE-Australian Journal of Agricultural and Resource Economics, APJCN-Asia Pacific Journal of Clinical Nutrition, AMJ-Australasian Marketing Journal, BFJ-British Food Journal, BJN-British Journal of Nutrition, CAER-China Agricultural Economic Review, CJAE-Canadian Journal of Agricultural Economics, EB-Economics Bulletin, EE-Empirical Economics, EHPM-Environmental Health and Preventive Medicine, FC-Food Control, FP-Food Policy, FQP-Food Quality and Preference, FS-Food Security, IH-International Health, IJBNPA-International Journal of Behavioral Nutrition and Physical Activity, IJER-International Journal of Economic Research, IJISSS-International Journal of Information Systems in the Service Sector, JCM-Journal of Consumer Marketing, JCP-Journal of Cleaner Production, JFAKU-Journal of the Faculty of Agriculture Kyushu University, JFR-Journal of Food Research, JRS-Journal of Rural Studies, NRP-Nutrition Research and Practice, PO-PLoS ONE, STE-Science of the Total Environment.

**Table S1. Cont.**

| <b>ID</b> | <b>Journals</b> | <b>Citations No.</b> | <b>H-Index</b> | <b>QE1</b> | <b>QE2</b> | <b>QE3</b> | <b>QE4</b> | <b>QE5</b> | <b>Scores</b> |
|-----------|-----------------|----------------------|----------------|------------|------------|------------|------------|------------|---------------|
| 29        | FP              | 43                   | 95             | 2          | 2          | 2          | 2          | 1          | 9             |
| 30        | APJCN           | 8                    | 72             | 2          | 2          | 2          | 1.5        | 1          | 8.5           |
| 31        | AB              | 5                    | 42             | 2          | 1          | 2          | 1          | 1          | 7             |

**Note.** AB-Agribusiness, AJARE-Australian Journal of Agricultural and Resource Economics, APJCN-Asia Pacific Journal of Clinical Nutrition, AMJ-Australasian Marketing Journal, BFJ-British Food Journal, BJN-British Journal of Nutrition, CAER-China Agricultural Economic Review, CJAE-Canadian Journal of Agricultural Economics, EB-Economics Bulletin, EE-Empirical Economics, EHPM-Environmental Health and Preventive Medicine, FC-Food Control, FP-Food Policy, FQP-Food Quality and Preference, FS-Food Security, IH-International Health, IJBNPA-International Journal of Behavioral Nutrition and Physical Activity, IJER-International Journal of Economic Research, IJISSS-International Journal of Information Systems in the Service Sector, JCM-Journal of Consumer Marketing, JCP-Journal of Cleaner Production, JFAKU-Journal of the Faculty of Agriculture Kyushu University, JFR-Journal of Food Research, JRS-Journal of Rural Studies, NRP-Nutrition Research and Practice, PO-PLoS ONE, STE-Science of the Total Environment.
